# Supplementary material
Source: PubMed Central journal article supplement (PMC4628560)

Full unedited gels for Figures 1 and 2

Figure 1 b

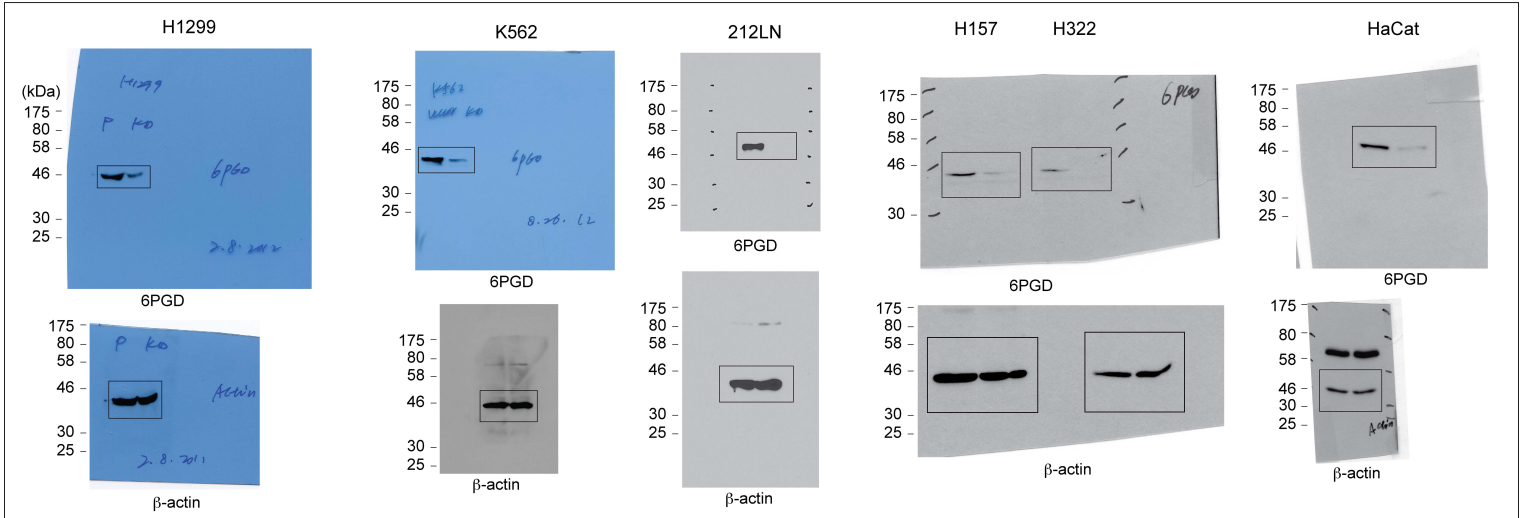

Figure 1d

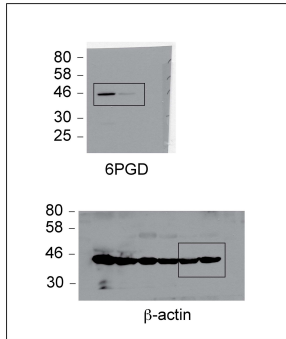

Figure 1f

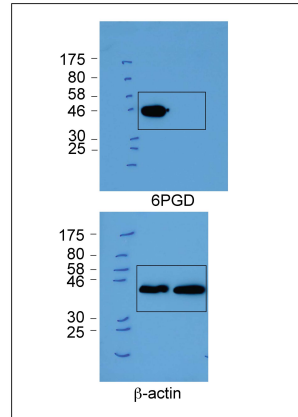

Figure 1j

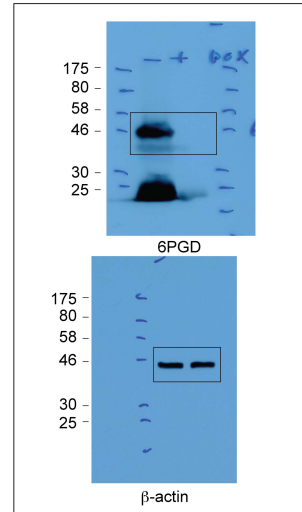

Figure 2c

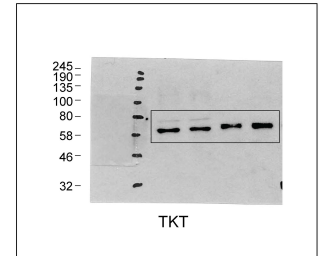

# Full unedited gels for Figure 4

Figure 4a

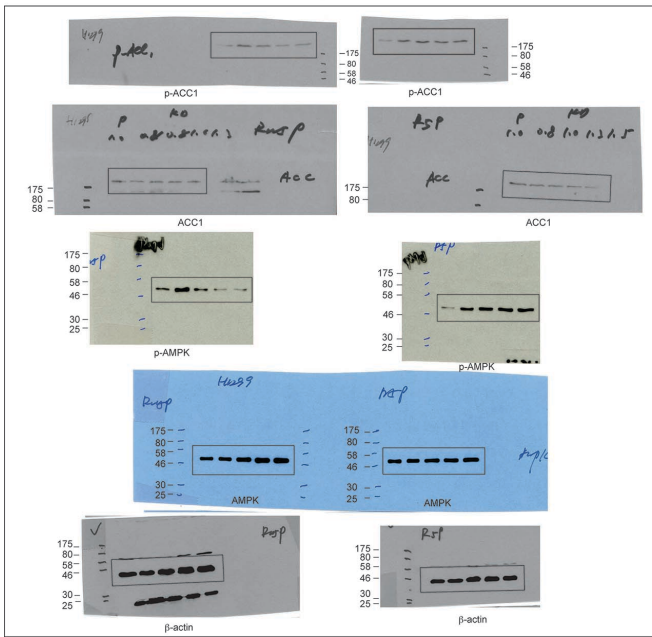

Figure 4c

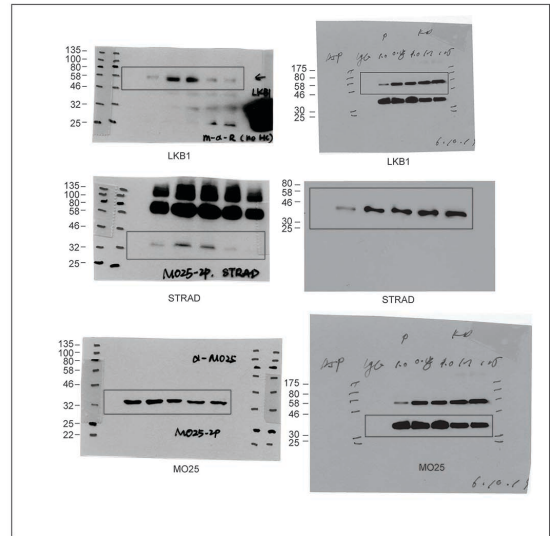

Figure 4b

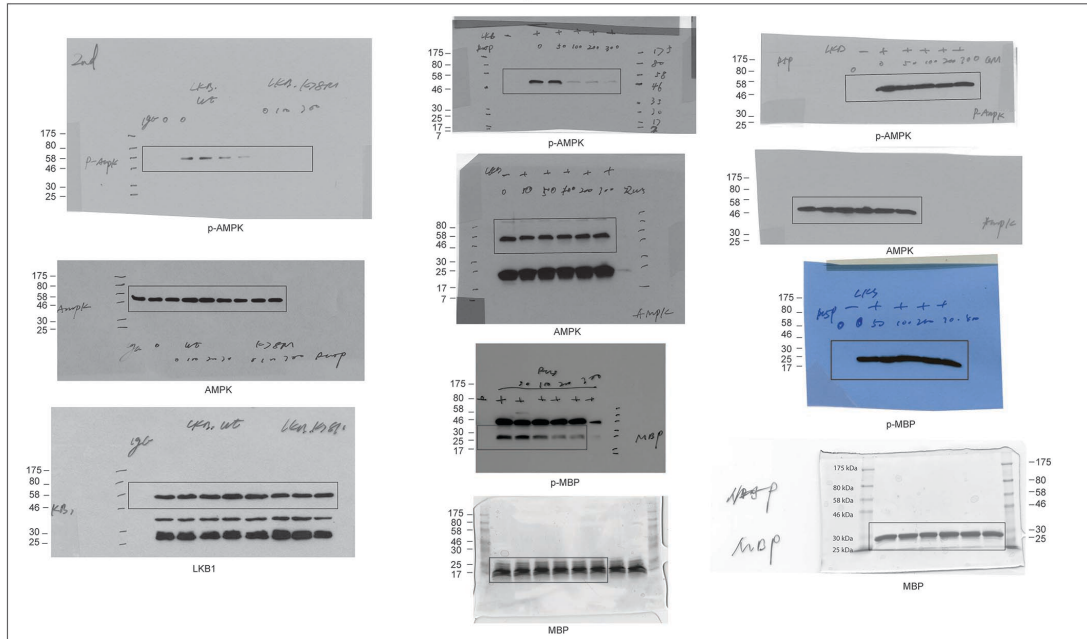

Figure 4d

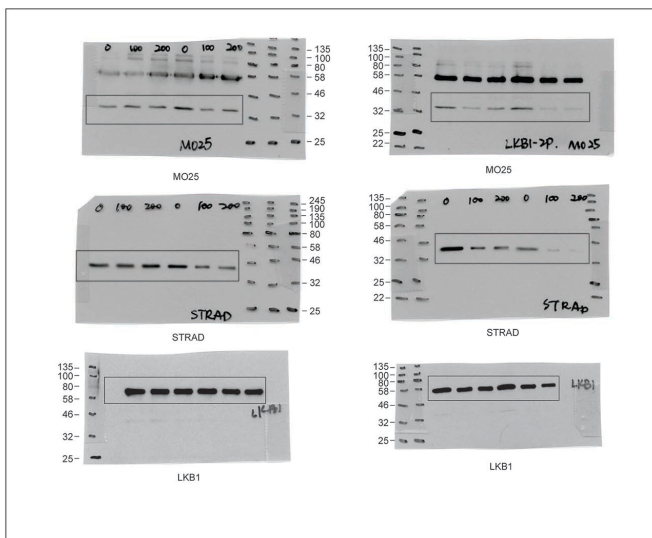

Figure 4e

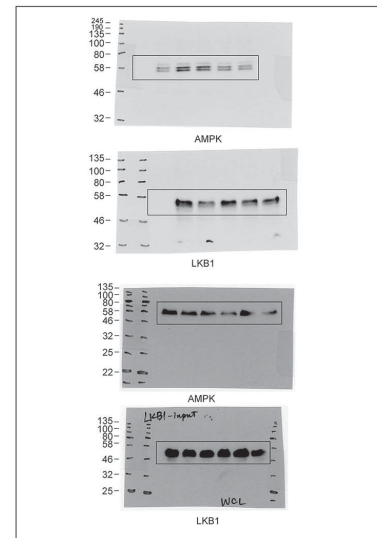

Full unedited gels for Figure 5

Figure 5c

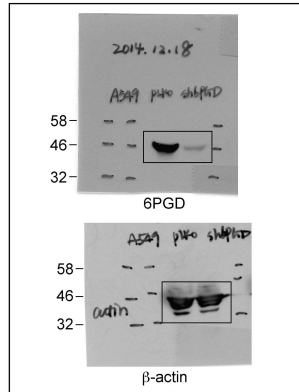

Figure 5e

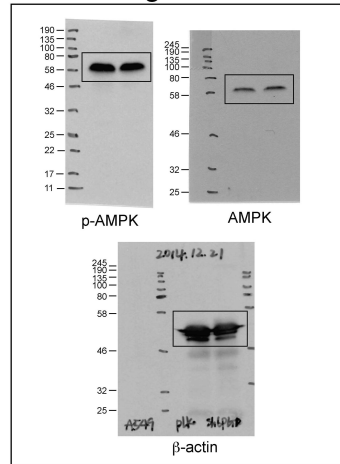

Figure 5g

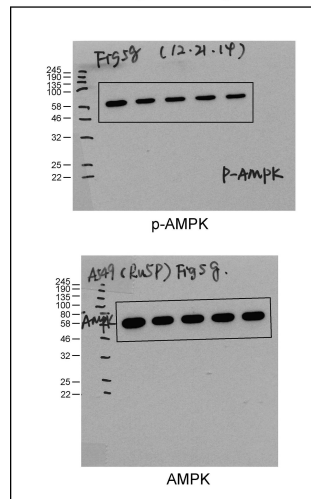

Figure 5k

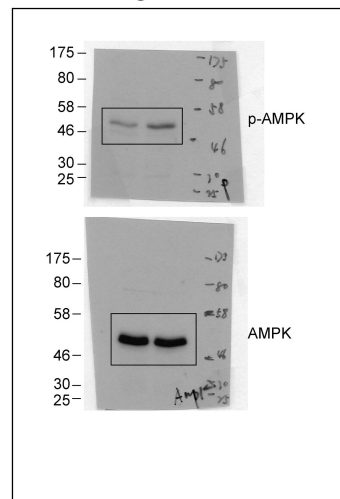

Full unedited gels for Figures 7 and 8

Figure 7e

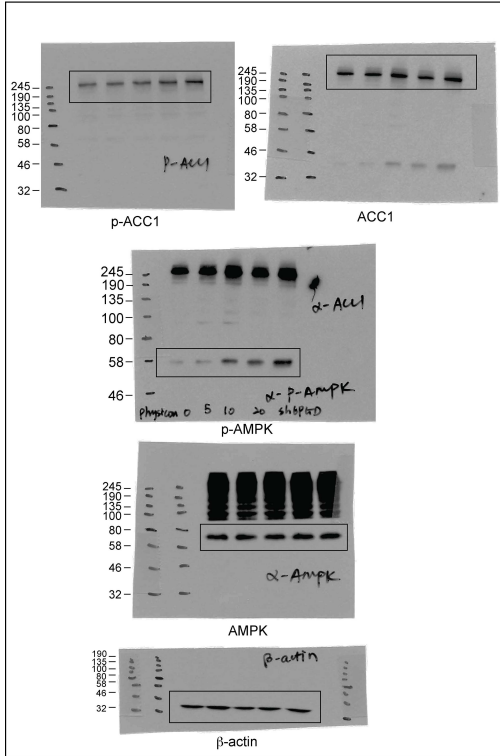

Figure 7f

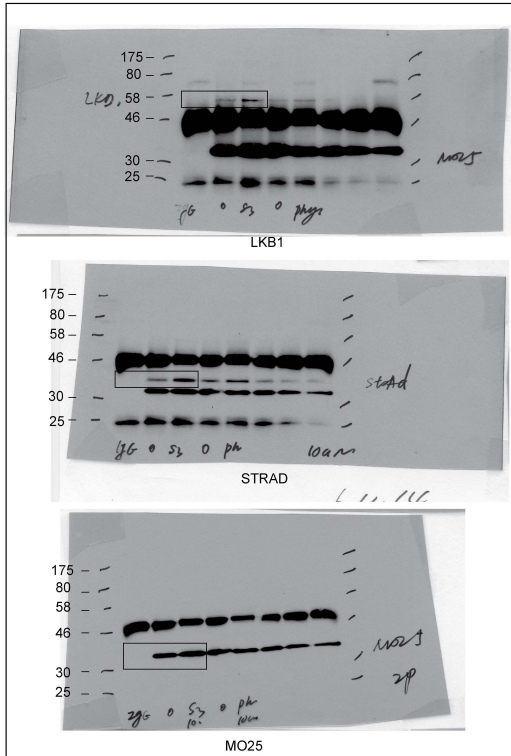

Figure 7i

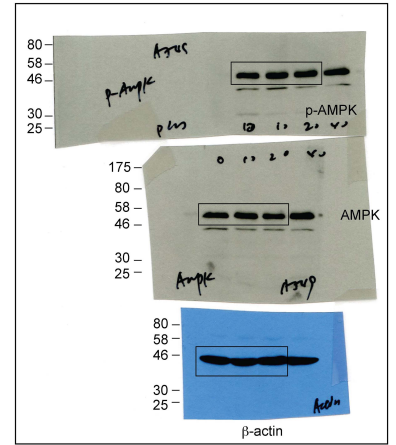

Figure 7r

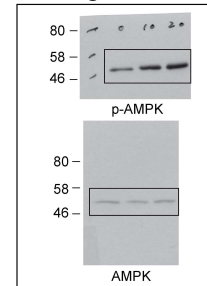

Figure 8c

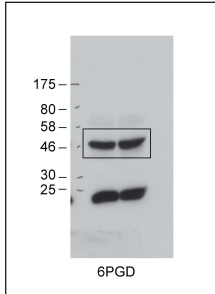

Figure 8f

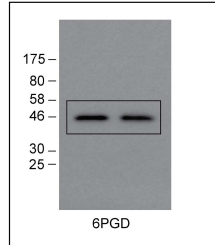

Figure 8i

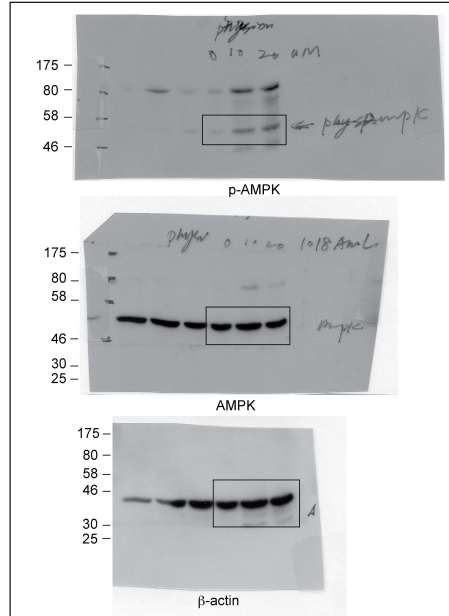

Figure 8j

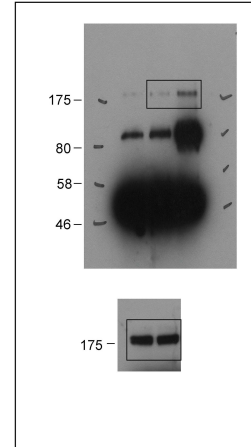

Full unedited gels for Supplementary Figure 1

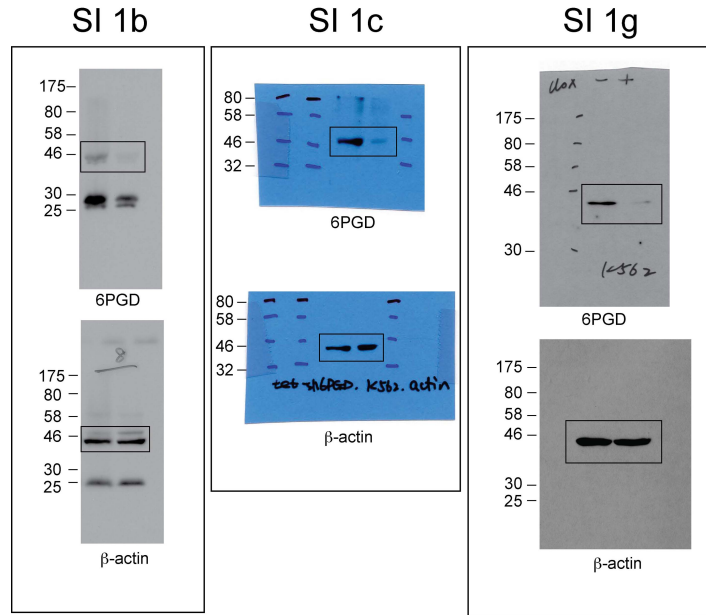

# Full unedited gels for Supplementary Figure 2

SI 2d

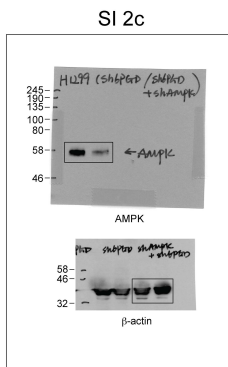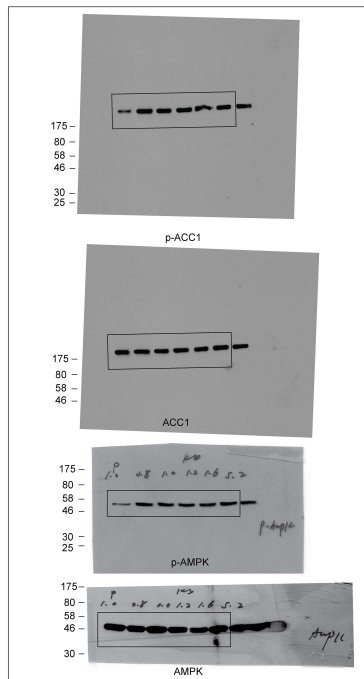

SI 2e

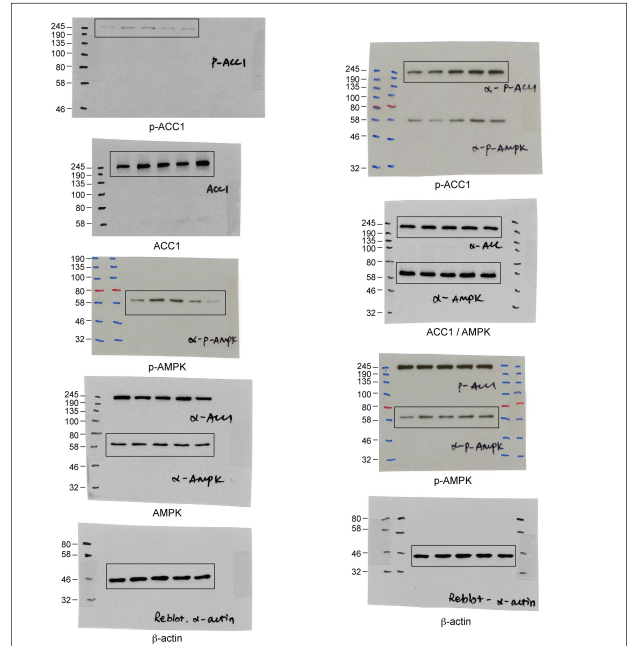

SI 2g

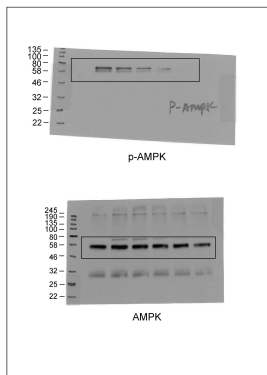

SI 2h

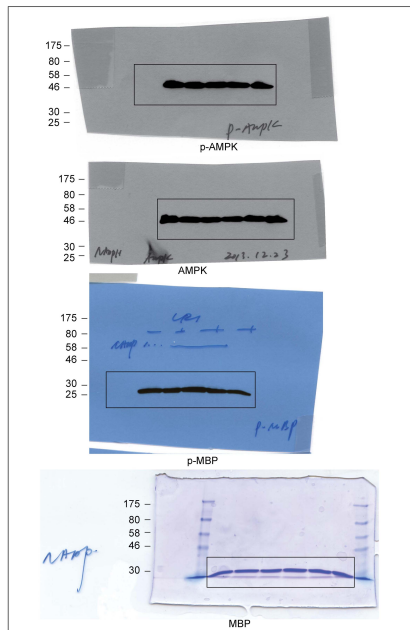

SI 2i

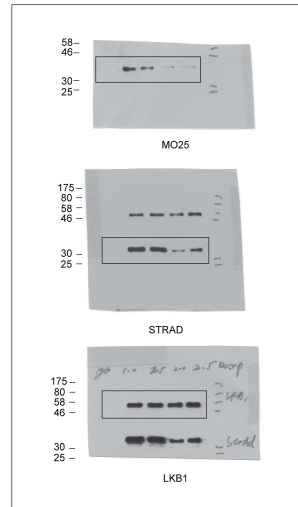

SI 2j

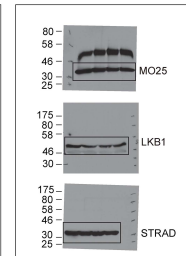

SI 2l

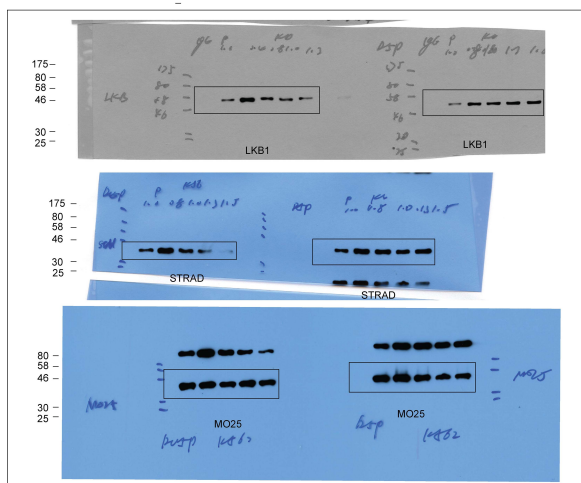

SI 2m

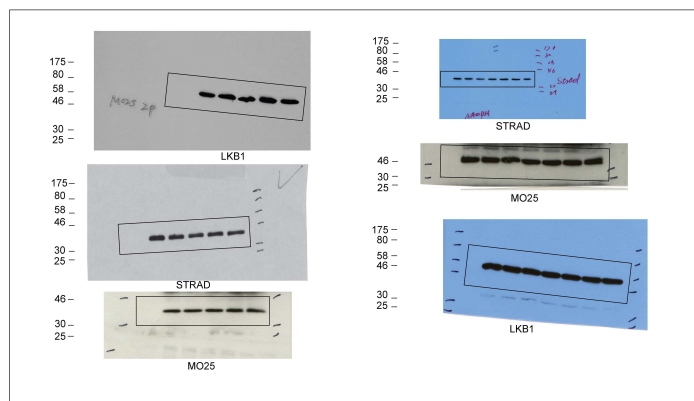

Full unedited gels for Supplementary Figure 3

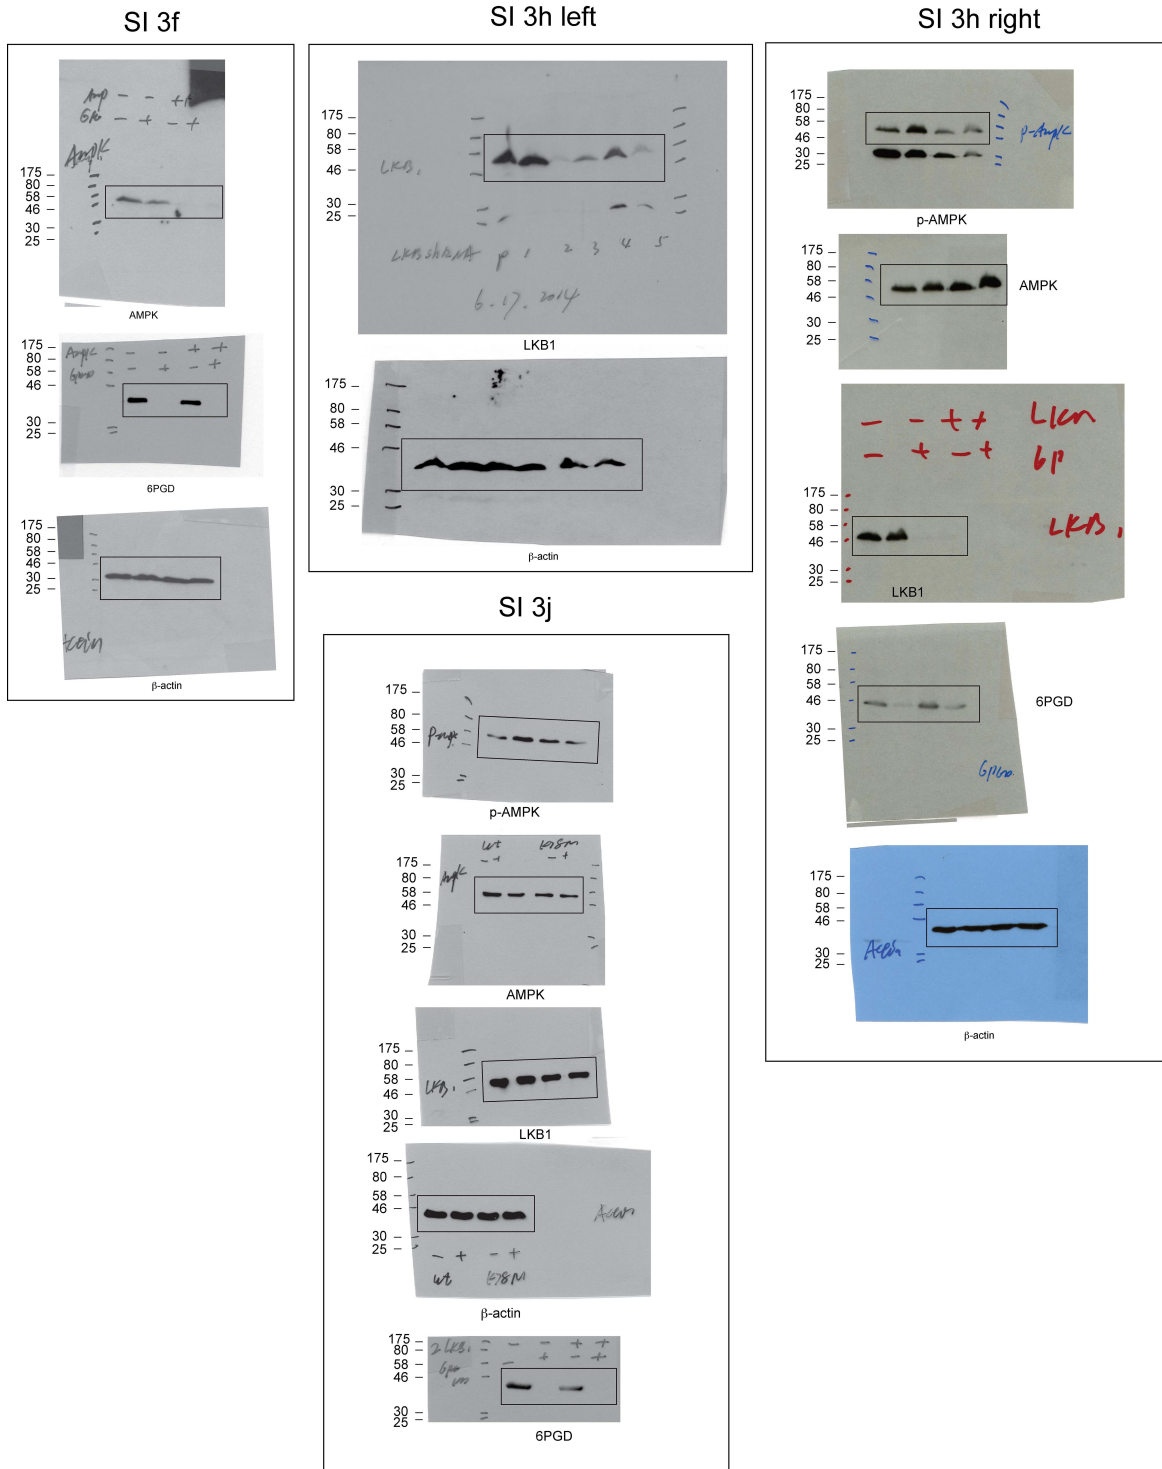

Full unedited gels for Supplementary Figures 4, 5, 8

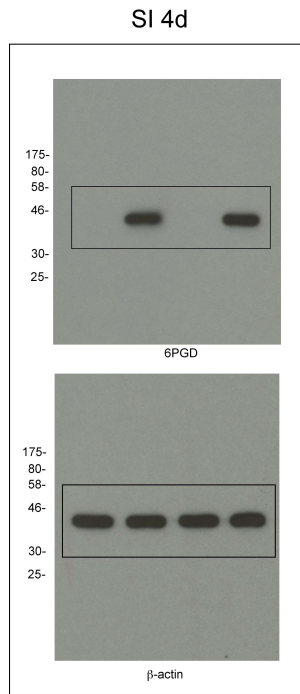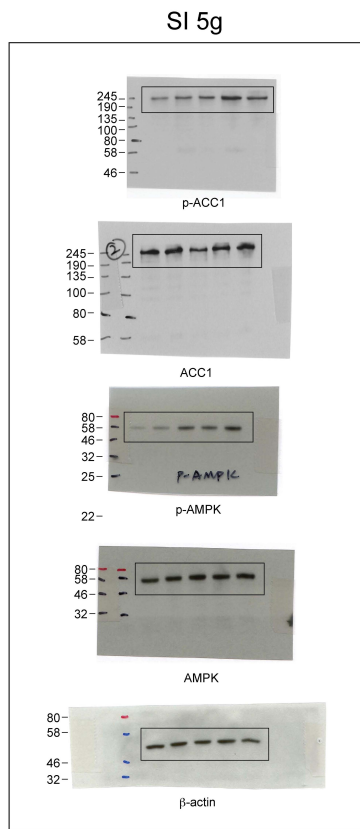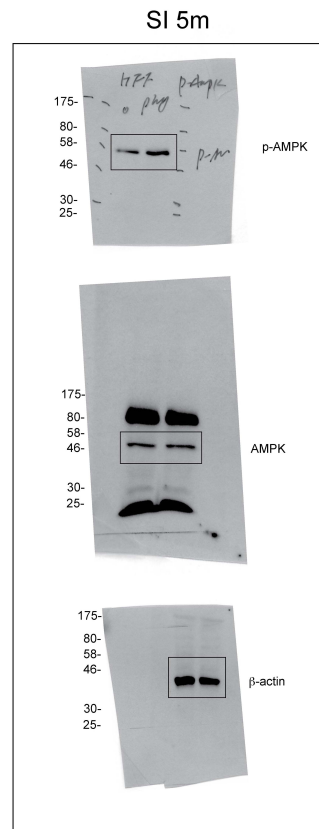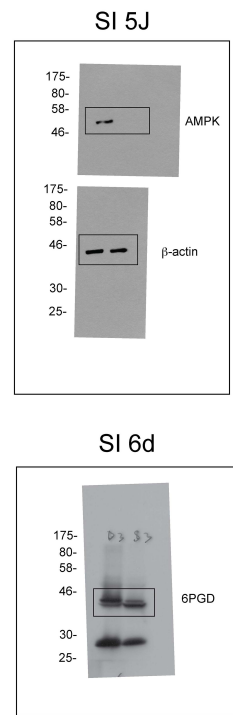

**SI 8b**

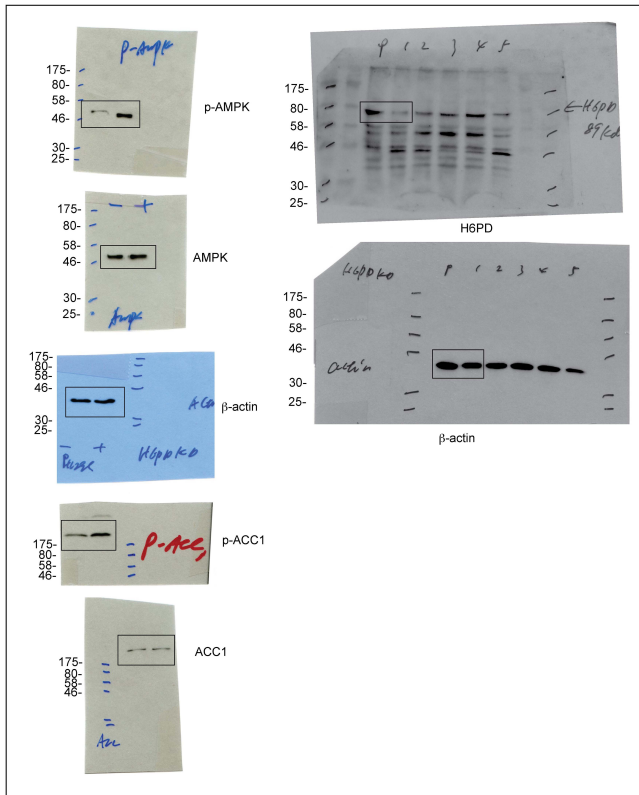

**SI 8c**

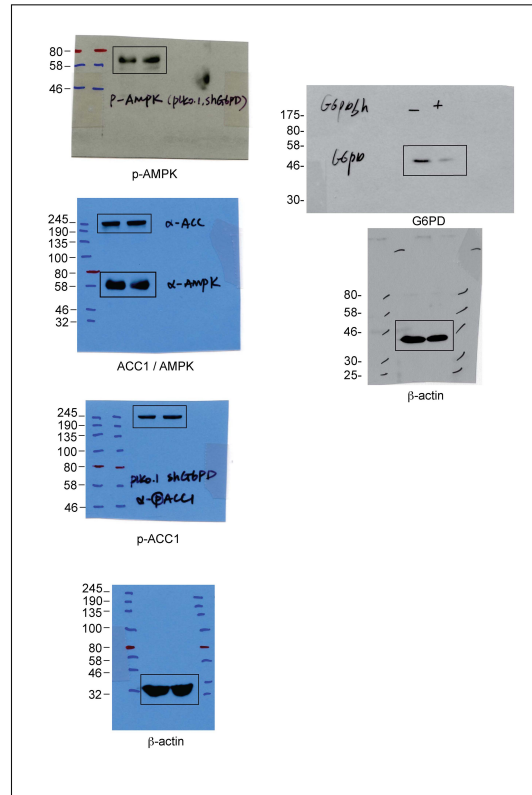

Supplement: NIHMS724509-supplement-10.pdf [file NIHMS724509-supplement-10.pdf]
