# Supplementary material
Source: PubMed Central journal article supplement (PMC4628560)

### Supplementary Fig. 3

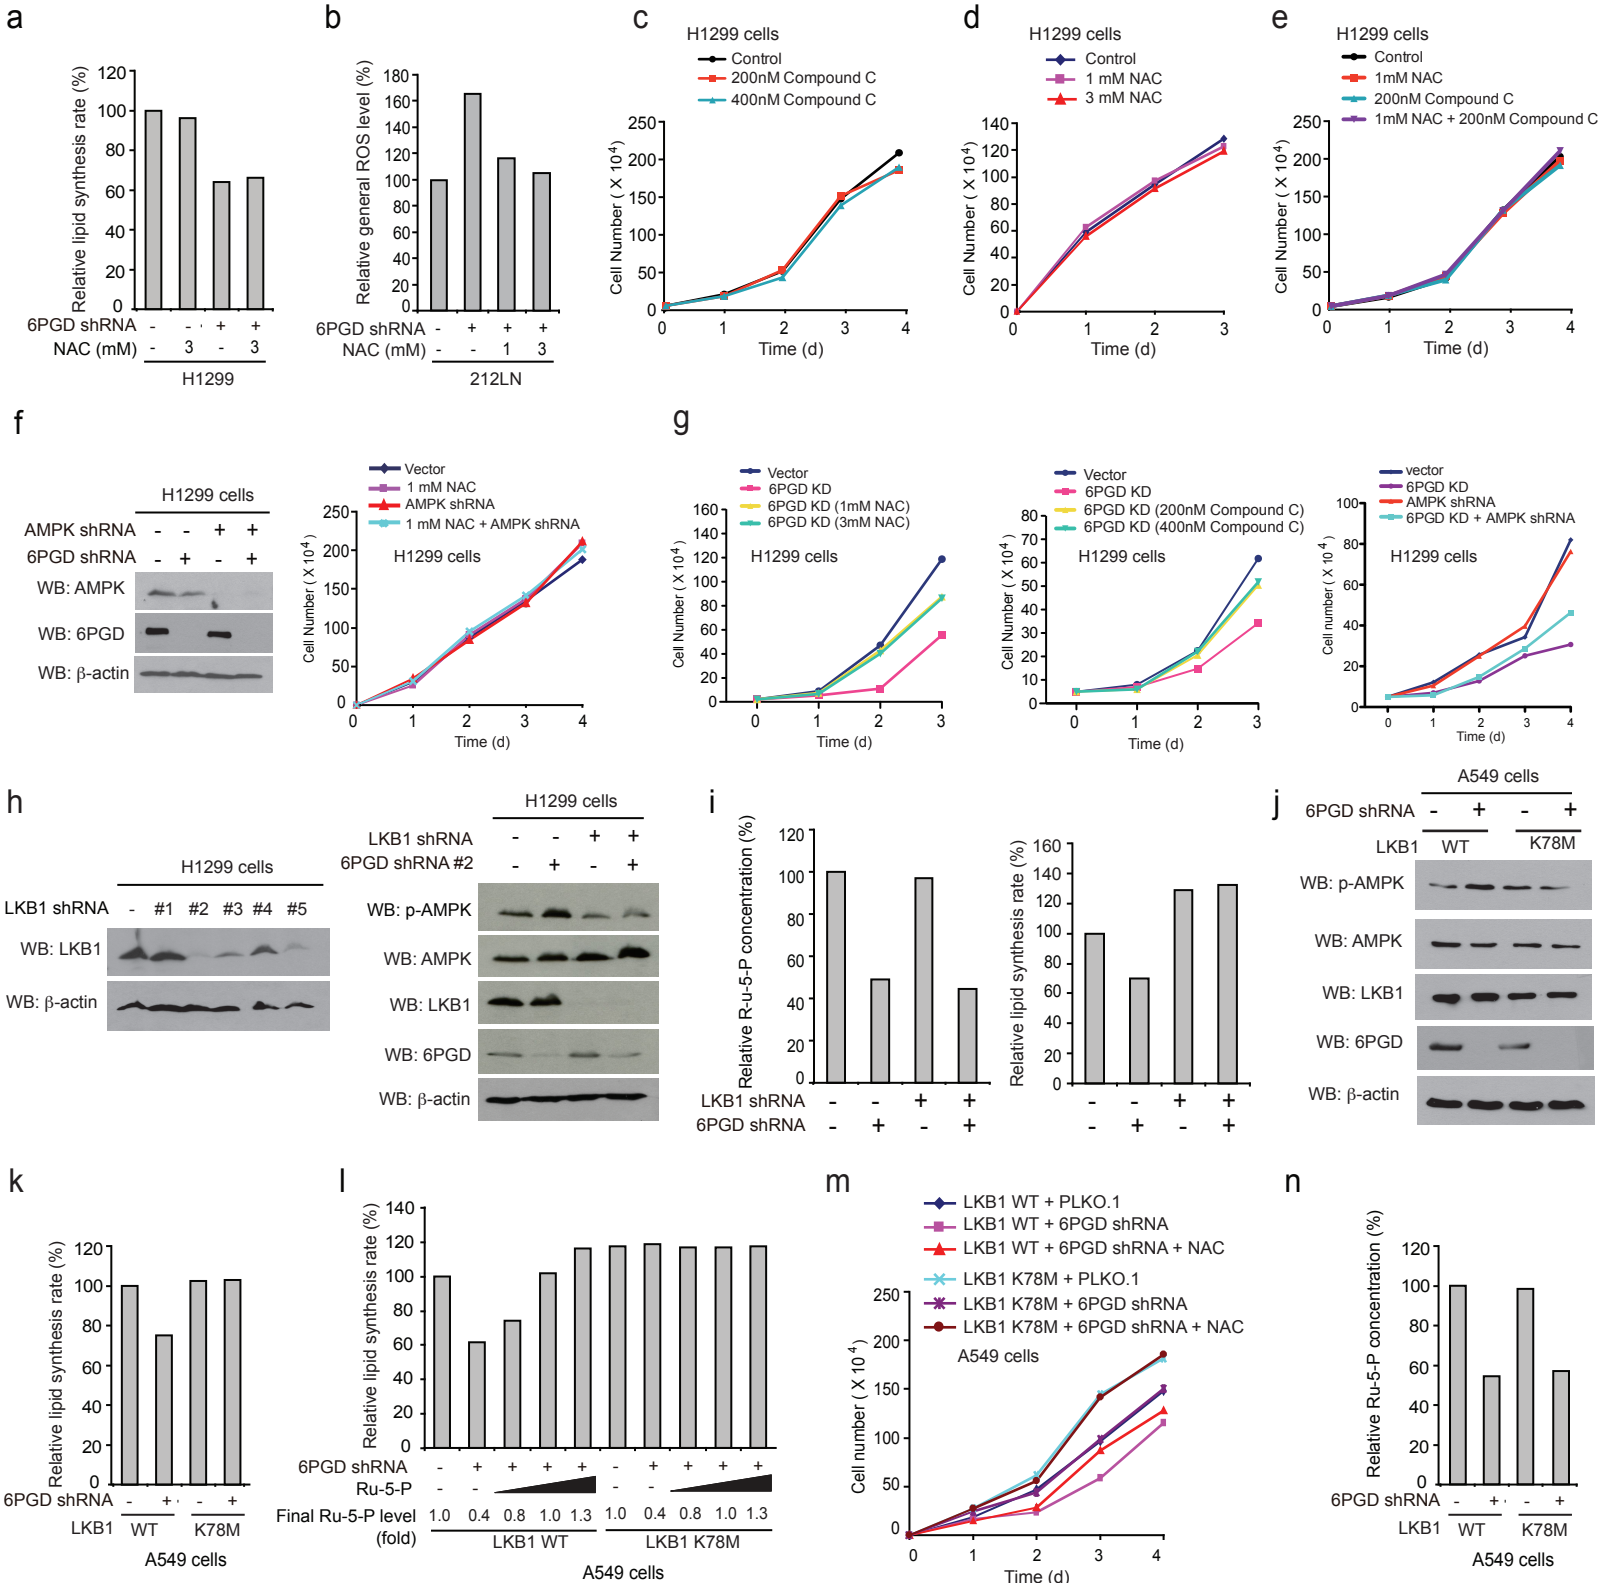

Supplement: NIHMS724509-supplement-4.pdf [file NIHMS724509-supplement-4.pdf]

# Supplementary Fig. 5

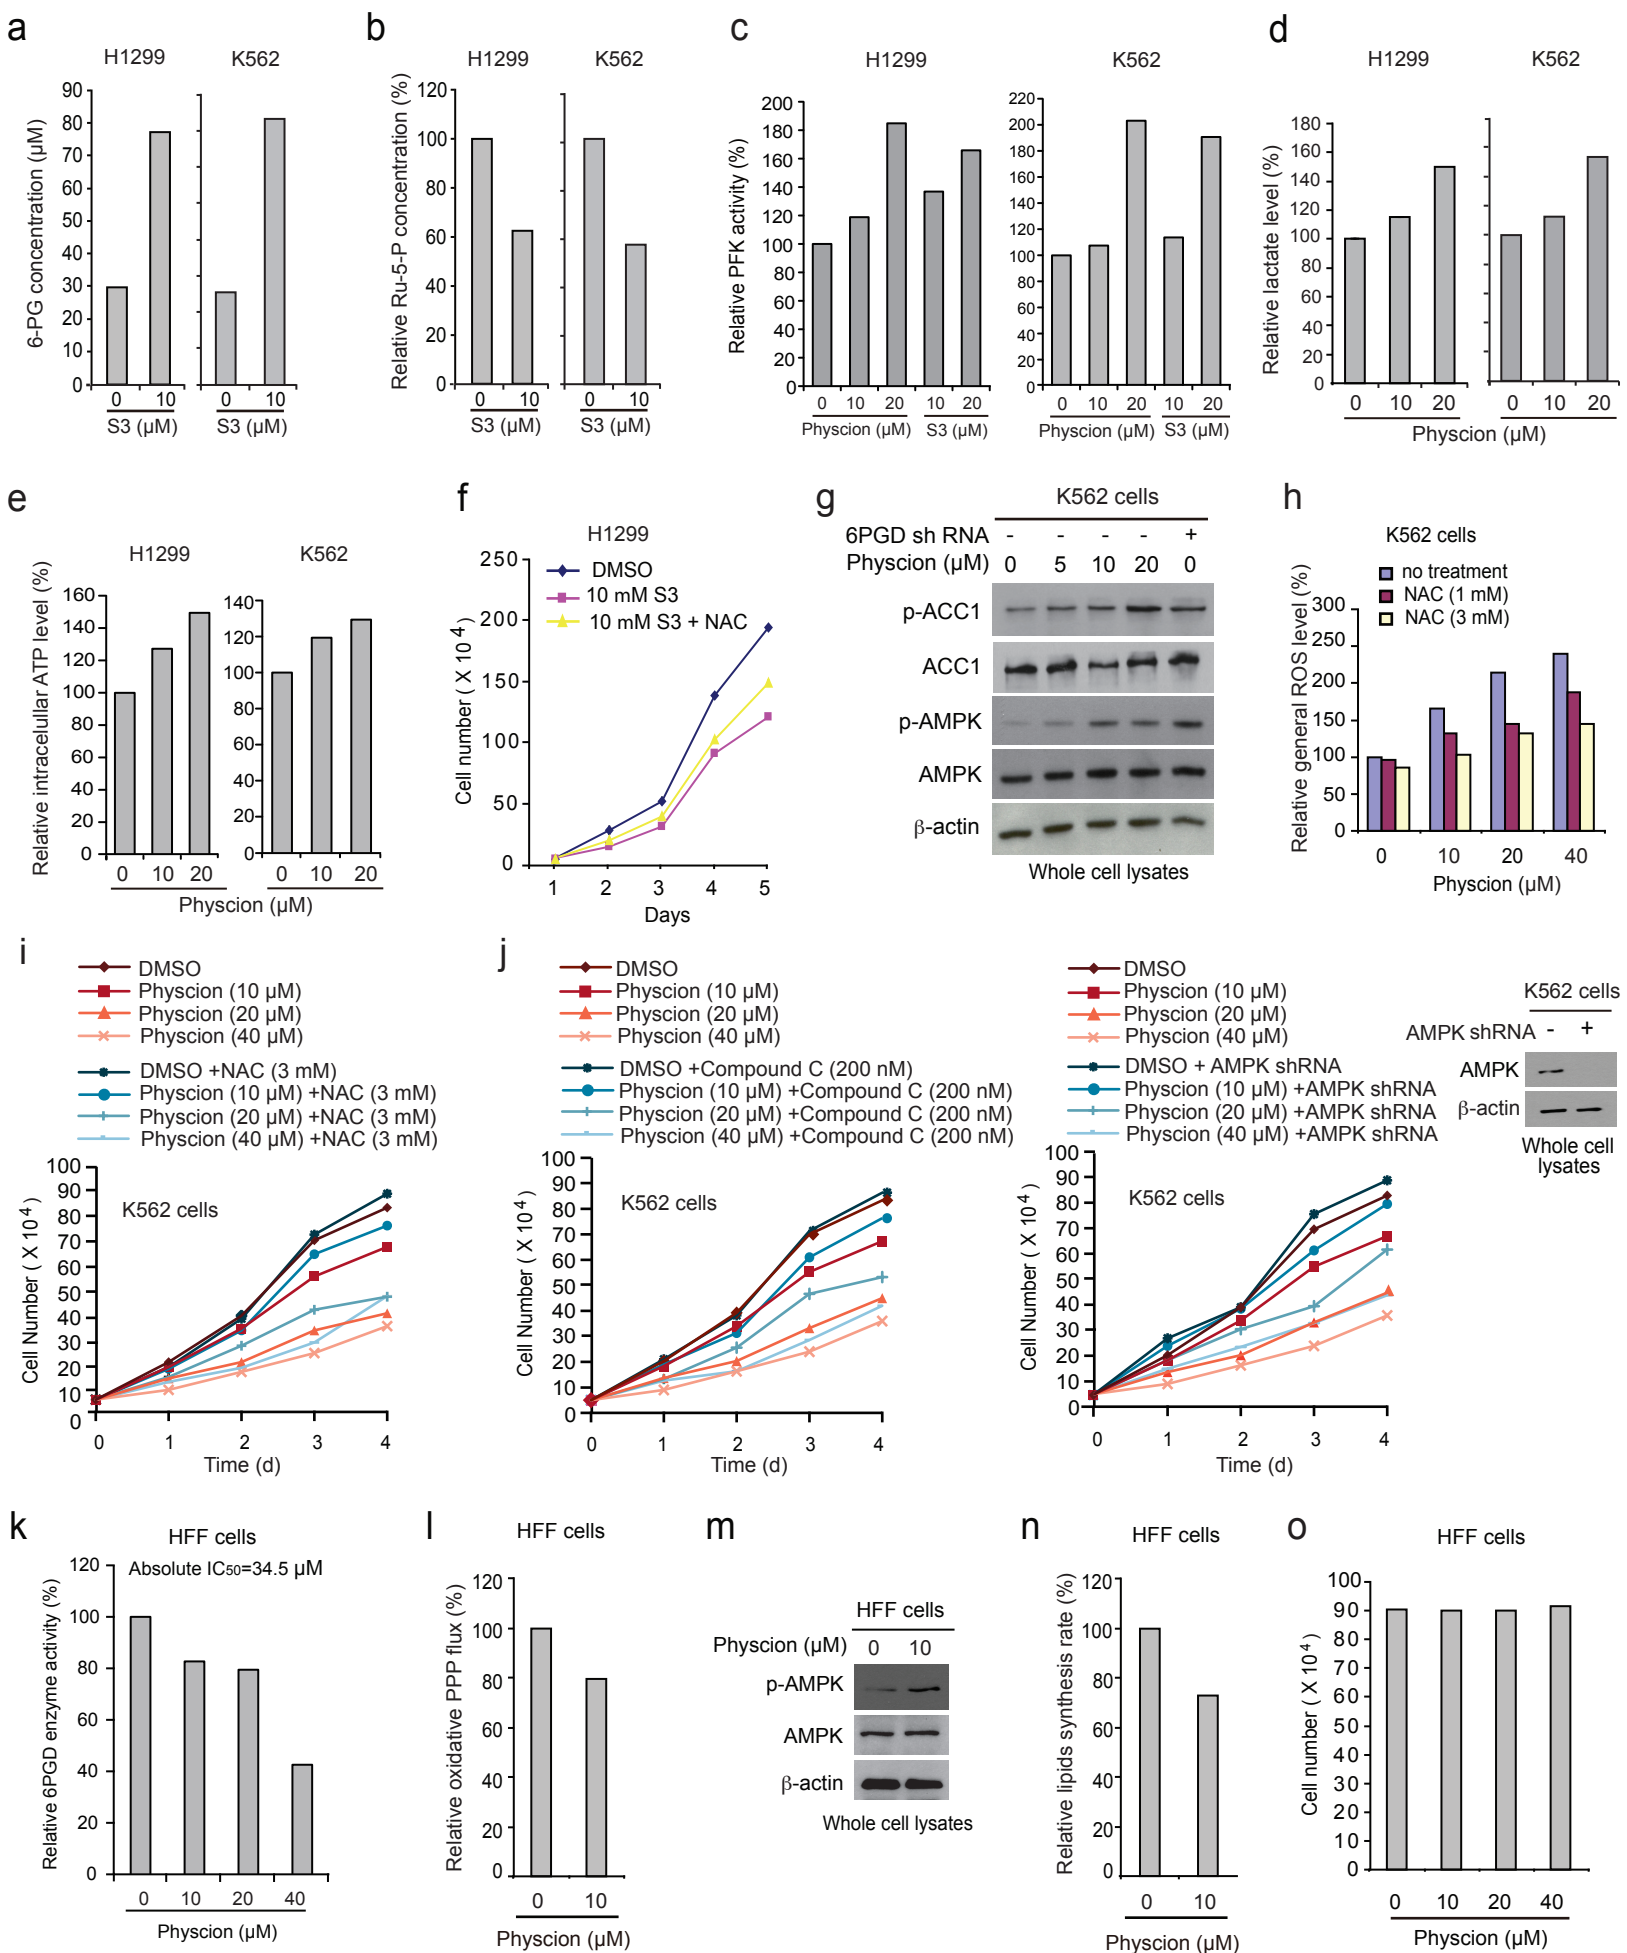

Supplement: NIHMS724509-supplement-6.pdf [file NIHMS724509-supplement-6.pdf]

# Supplementary Fig. 7

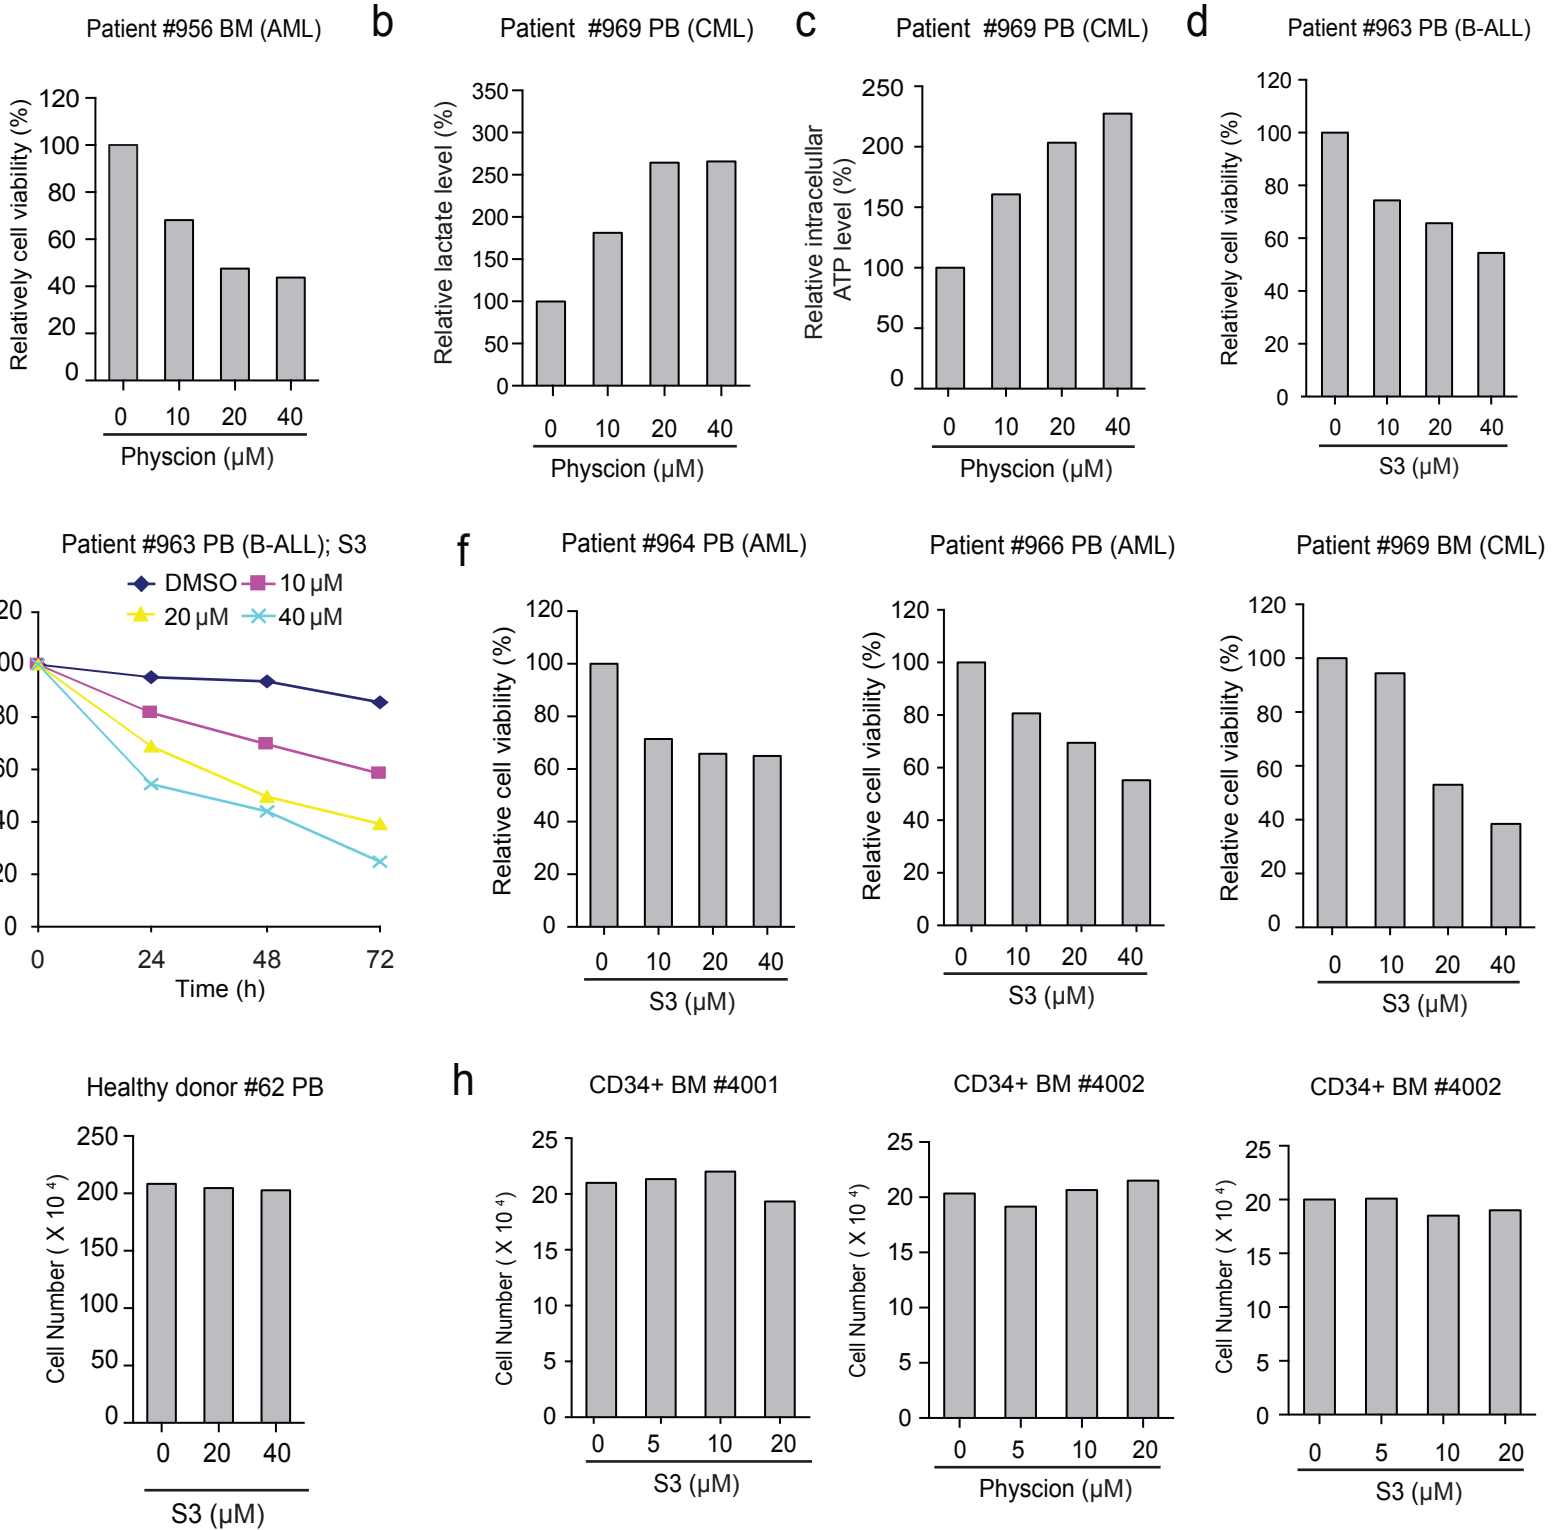

Supplement: NIHMS724509-supplement-8.pdf [file NIHMS724509-supplement-8.pdf]
